# Supplementary material for: Association between hip joint impingement and lumbar disc disease in elite rowers
Source: HighWire-hosted journal article supplement (doi:10.1136/bmjsem-2021-001063), 2021-11-01
Supplement: bmjsem-2021-001063supp001_data_supplement.pdf [file bmjsem-2021-001063supp001_data_supplement.pdf]

| <b>Patient reported outcome measure</b>            | <b>Subheading</b>                            | <b>Median Score (IQR)</b> |
|----------------------------------------------------|----------------------------------------------|---------------------------|
| The Copenhagen Hip and Groin Outcome Score (HAGOS) | Symptoms and stiffness                       | 89 (79, 96)               |
|                                                    | Pain                                         | 99 (93, 100)              |
|                                                    | Physical function and daily living           | 100 (99, 100)             |
|                                                    | Function, sports and recreational activities | 100 (93, 100)             |
|                                                    | Participation in physical activities         | 100 (100, 100)            |
|                                                    | Quality of life                              | 100 (89, 100)             |
| Oswestry Disability Index (ODI)                    | Pain intensity                               | 0 (0,1)                   |
|                                                    | Personal care                                | 0 (0,0)                   |
|                                                    | Lifting                                      | 0 (0,0)                   |
|                                                    | Walking                                      | 0 (0,0)                   |
|                                                    | Sitting                                      | 0 (0,1)                   |
|                                                    | Standing                                     | 0 (0,1)                   |
|                                                    | Sleeping                                     | 0 (0,1)                   |
|                                                    | Sex life                                     | 0 (0,0)                   |
|                                                    | Social life                                  | 0 (0,0)                   |
|                                                    | Travelling                                   | 0 (0,1)                   |

**Supplementary table 1: Patient reported outcome measures**
